# Supplementary material for: Regional variations in the diversity and predicted metabolic potential of benthic prokaryotes in coastal northern Zhejiang, East China Sea
Source: PubMed Central journal article supplement (PMC5137025; doi:10.1038/srep38709), 2016-12-05
Supplement: srep38709-s1.pdf [file srep38709-s1.pdf]

## Supplementary Figures

### Regional variations in the diversity and predicted metabolic potential of benthic prokaryotes in coastal northern Zhejiang, East China Sea

Kai Wang, Xiansen Ye, Huajun Zhang, Heping Chen, Demin Zhang & Lian Liu

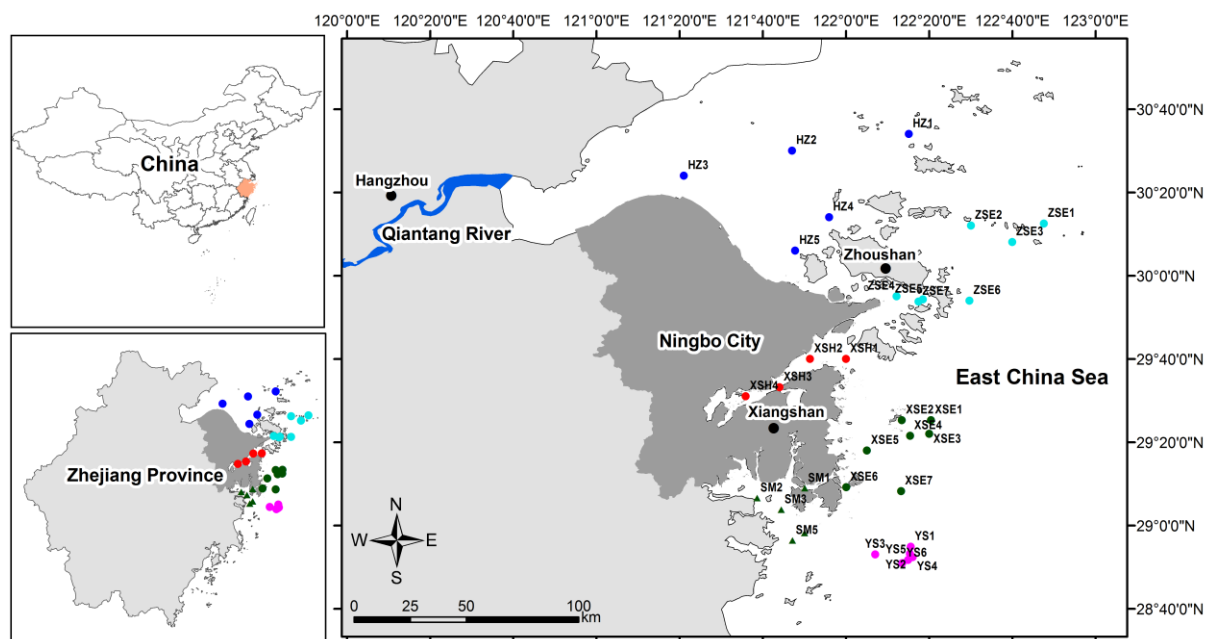

**Figure S1. Map of the sampling stations from the six coastal zones in the northern Zhejiang, East China Sea.** YS: Yushan, XSH: Xiangshan Harbor, HZ: Hangzhou Bay, ZSE: eastern Zhoushan Islands, XSE: eastern Xiangshan, SM: Sanmen Bay. The map was created using ArcGIS 10.0 (<https://www.arcgis.com>).

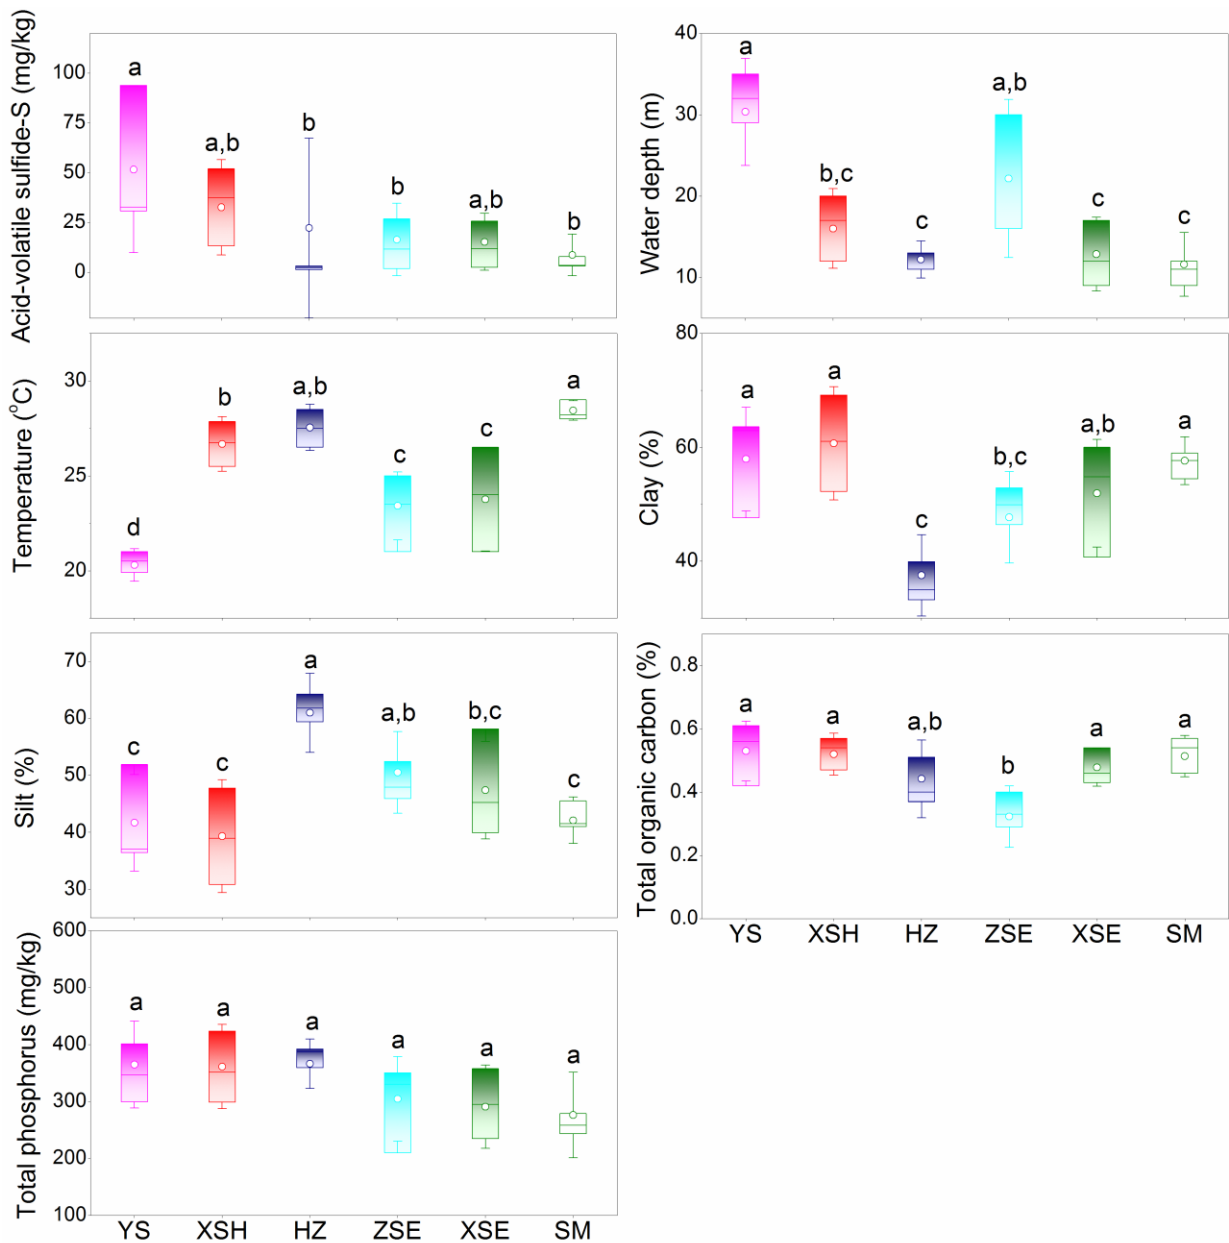

**Figure S2. Boxplots illustrating the variations of key environmental factors in sediments across six coastal zones.** The lines at the top, bottom, and middle of the box correspond to the 75th, 25th, and 50th percentiles (median), respectively. Whiskers indicate  $\pm$  standard deviation. The white dots indicate the means. Data sets sharing a letter above the bars are not significantly different from each other, whereas two data sets without a letter in common are significantly different (multiple comparison test after Kruskal-Wallis,  $P < 0.05$ ).

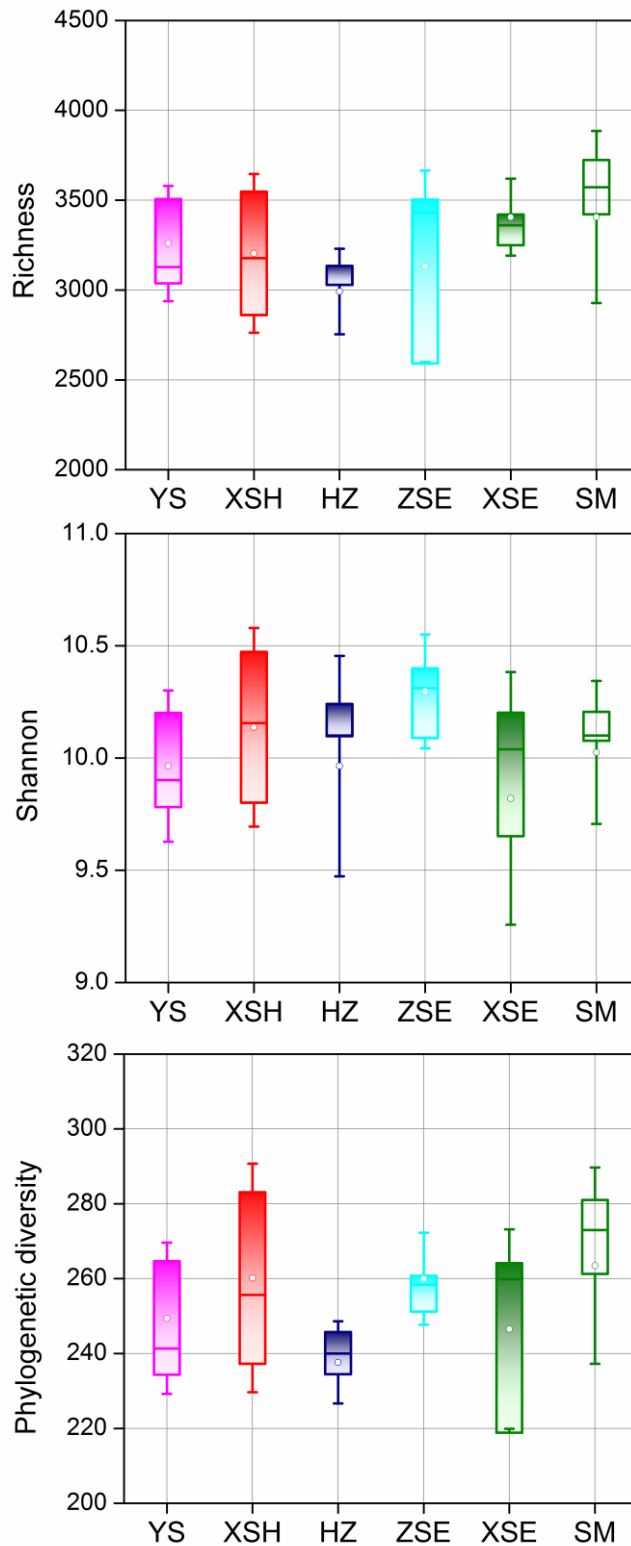

**Figure S3.  $\alpha$ -Diversity of prokaryotic community across six coastal zones.** The lines at the top, bottom, and middle of the box correspond to the 75th, 25th, and 50th percentiles (median), respectively. Whiskers indicate  $\pm$  standard deviation. The white dots indicate the means.

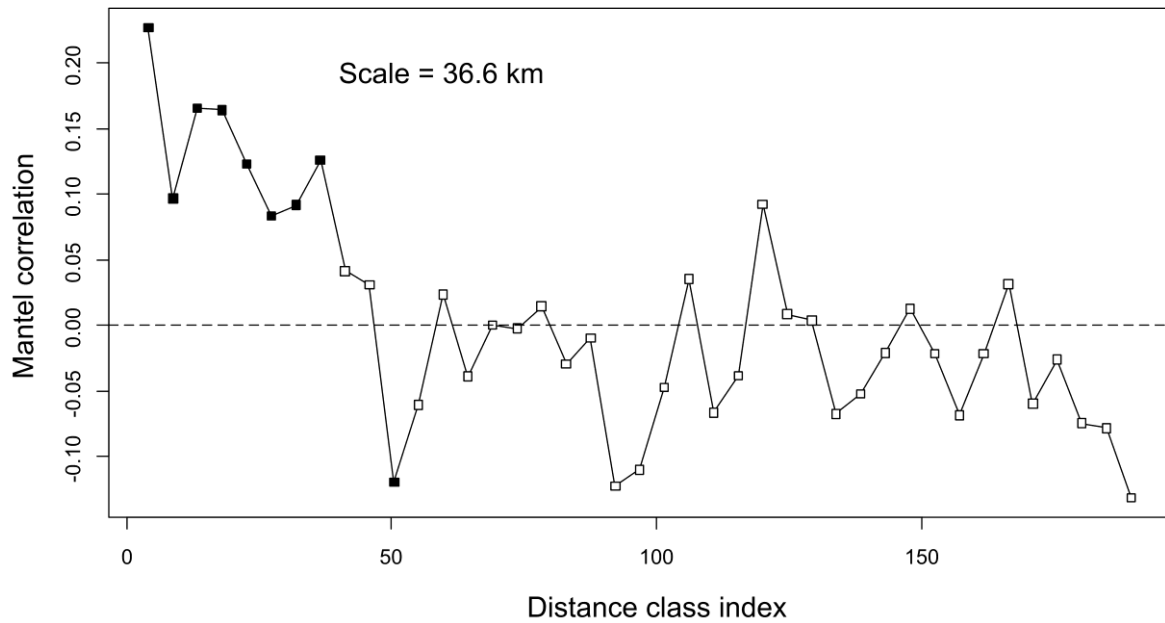

**Figure S4. Mantel correlogram demonstrating the significance of distance effect on prokaryotic  $\beta$ -diversity across a subset of different geographic distance scales (classes) among the sampling stations.** Pearson correlations between the pairwise matrix of Bray-Curtis distance and geographic distance between stations within each geographic distance class were generated by Mantel tests with 999 permutations. Significant correlations ( $P < 0.05$ , solid squares with positive values) indicate spatial correlation in  $\beta$ -diversity, observed at short geographic distance scales among the sampling stations.

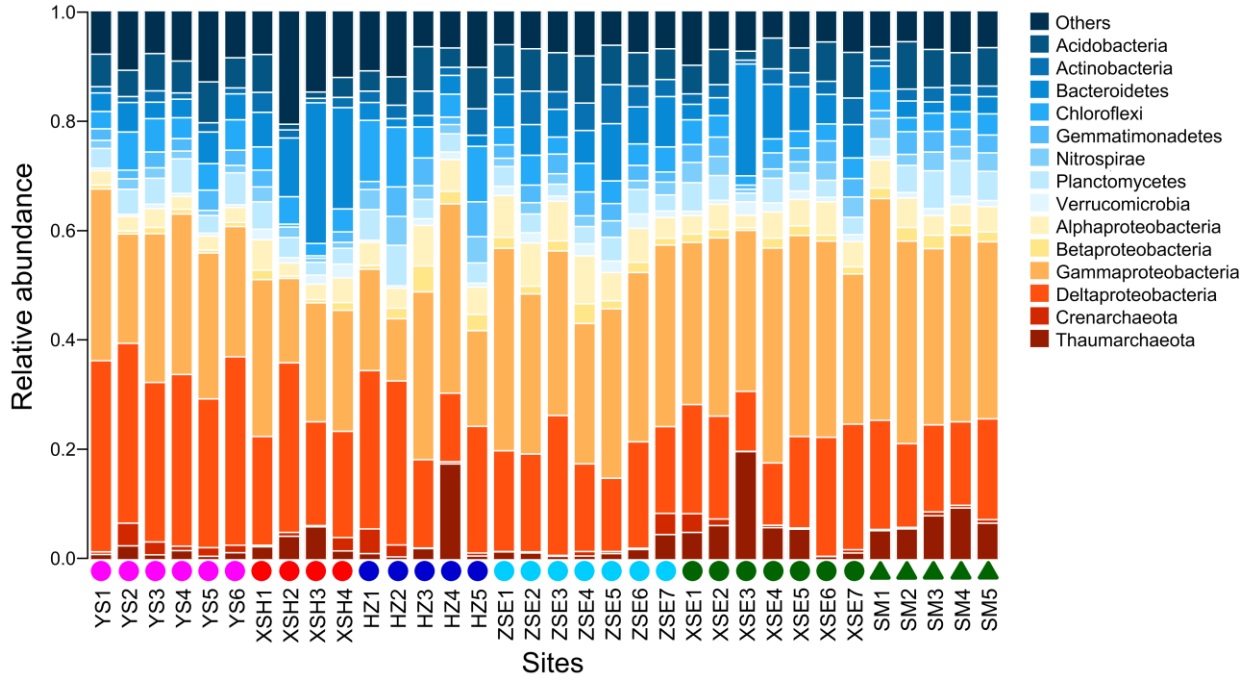

**Figure S5. Relative abundances of the dominant phyla** (average relative abundance >1%; phylum *Proteobacteria* is grouped at the class level; we filtered *Thaumarchaeota* reads out of the phylum *Crenarchaeota* as classified in the Greengenes database).

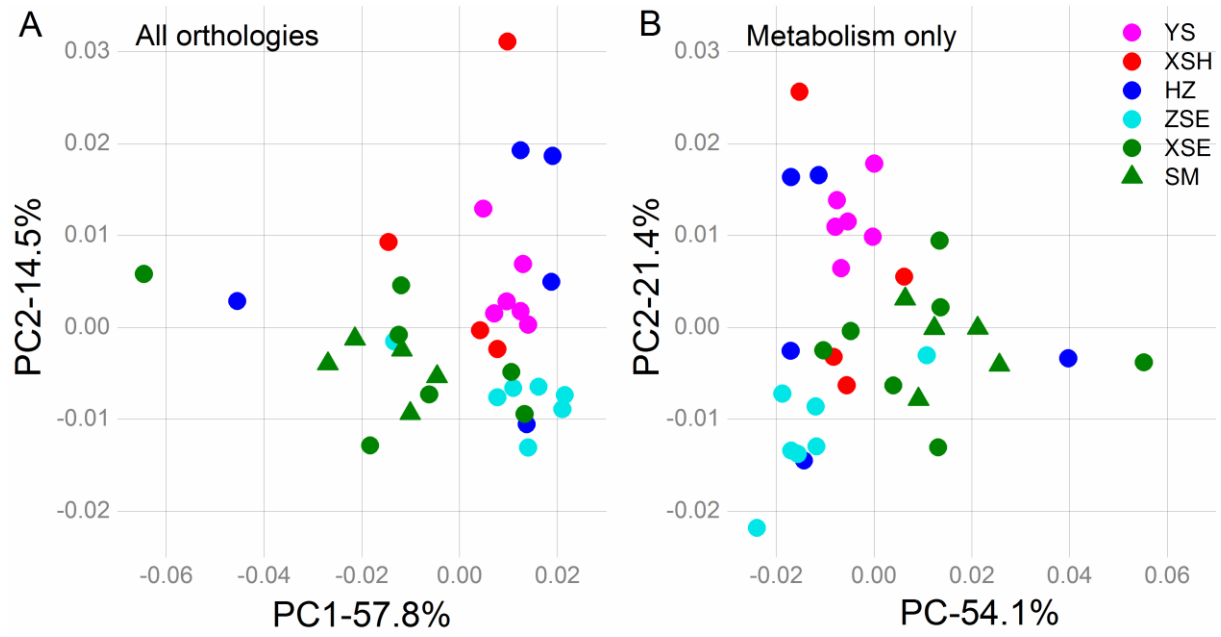

**Figure S6. Principal Coordinate Analysis (PCoA) based on Bray-Curtis distance of sediments using (A) PICRUSt predicted KEGG orthologies (KOs) and (B) KOs only classified as “Metabolism” in KEGG functional hierarchies.**
